# 1 Prevalence and predictors of not testing for HIV among 2 young men in Papua New Guinea: a cross-sectional 3 analysis from a nationally representative sample

4 McKenzie Ken Maviso<sup>1\*</sup>

5 <sup>1</sup>Division of Public Health, School of Medicine and Health Sciences, University of Papua New  
6 Guinea, Port Moresby, Papua New Guinea

7  
8 \*Corresponding author

9 Email: [mckenzie.maviso@upng.ac.pg](mailto:mckenzie.maviso@upng.ac.pg)

## 10 11 Abstract

12 HIV testing is a crucial strategy for HIV prevention, treatment, care, and support. However, its  
13 uptake is suboptimal among young people, particularly in settings where the HIV burden is  
14 highest. In Papua New Guinea (PNG), HIV testing and its predictors among young men are  
15 understudied. This study aimed to assess the prevalence and predictors of not testing for HIV  
16 among young men aged 15–24 years in PNG. Data were drawn from the 2016–2018 PNG  
17 Demographic and Health Survey (DHS). A total of 1,362 young men were included in the  
18 study. A multivariable logistic regression analysis using the complex sampling technique was  
19 used to determine predictors of not testing for HIV. Results were reported as adjusted Odds  
20 Ratios (AOR) with 95% Confidence Intervals (CI). The prevalence of not testing for HIV  
21 among young men was 82.7%. Young men who were never married (AOR 1.88; 95% CI:  
22 1.19–2.96), did not own a mobile phone (AOR 1.79; 95% CI: 1.17–2.77), had not paid anyone  
23 for sex (AOR 2.82; 95% CI: 1.29–6.14), and had no STIs (AOR 1.97; 95% CI: 1.00–3.85) had  
24 higher odds of not testing for HIV. The odds of not testing for HIV remained lower among  
25 young men who did not always use a condom during sex (AOR 0.62; 95% CI: 0.39–0.96). HIV  
26 testing among young men in this study was much lower, suggesting an urgent need to adopt  
27 novel prevention approaches to address this shortfall. Furthermore, youth-oriented health  
28 services should be prioritized with a focus on improving HIV knowledge, risk reduction, and  
29 behaviour change among young men in this setting.

30 **Keywords:** HIV, HIV testing, STIs, Young people, Papua New Guinea

31

## 32 **Introduction**

33 Globally, significant progress has been made in efforts to address the burden of the human  
34 immunodeficiency virus (HIV), leading to a 32% reduction in new infections since 2010 [1]. At  
35 the same time, there was a 46% decrease in new HIV infections among young people aged  
36 15–24 years [2]. Despite the remarkable progress, HIV continues to have a significant impact  
37 on this population, with new infection rates remaining high and health disparities becoming  
38 more evident [3,4]. Two out of every seven new HIV infections in 2019 were among young  
39 people [2], contributing to an estimated 36% of new HIV infections globally [5]. In the Asia–  
40 Pacific region, an estimated 63,000 young people were living with HIV in 2021, contributing to  
41 26% of new HIV infections, with young men being twice as likely to acquire HIV as young  
42 women [6]. In addition, about 35% of young females and 65% of young males in the region  
43 were newly infected with HIV, despite being credited with some of the initial achievements in  
44 HIV prevention interventions [7]. HIV testing rates remain low among this population, with  
45 many unaware of their statuses, and those living with the virus exhibit low adherence to  
46 antiretroviral therapy (ART) [8–10], which is below reaching the ambitious goals of ART  
47 adherence [11].

48 Sexual risk behaviours such as having sex at an early age, having multiple sexual partners,  
49 having sex under the influence of alcohol or drugs, and having unprotected sex are well-  
50 documented drivers for HIV and other STIs [12–14]. In addition, a lack of HIV knowledge and  
51 inconsistent condom use, especially among young people, significantly increase the risk of  
52 HIV transmission [15–17]. Efforts to increase knowledge of condom use and reduce HIV risks,  
53 as well as HIV testing, remain critical for young people. In particular, HIV testing is among the

54 cornerstones of most HIV prevention strategies, in which individuals can be educated about  
55 risky behaviours regarding the infection and offered an initial step into the continuum of care,  
56 as well as preventing transmission [18]. This aligns with the ambitious UNAIDS 95–95–95  
57 target: 95% of all people living with HIV will know their actual status; 95% of people with  
58 diagnosed HIV infection will receive sustained antiretroviral therapy (ART); and 95% of all  
59 people receiving ART will have viral suppression [19].

60 Papua New Guinea (PNG) is one of the most linguistically diverse countries in the Western  
61 Pacific region and has the highest prevalence of HIV. In 2020, an estimated 55,000 people  
62 were living with HIV [20]. Among the general adult population with HIV in PNG, the incidence  
63 has been increasing among young people, with 27% of new infections occurring in 2020 [6].  
64 Recent estimates suggest that HIV prevalence among young people in PNG stands at 0.2%  
65 and 0.4% for males and females, respectively [21]. Heterosexual sex remains the  
66 predominant mode of HIV transmission among the adult population in the country. Efforts to  
67 strengthen the availability and accessibility of HIV testing services as part of the National  
68 Strategic Plan for HIV and AIDS (Acquired Immunodeficiency Syndrome) have expanded  
69 over the years [22]. HIV testing, which includes risk reduction counselling that greatly  
70 influences one's perception of HIV acquisition and increases access to ART, has been shown  
71 to change HIV-related risk behaviours in PNG [23–25].

72 Despite commendable efforts to increase the availability of HIV testing and treatment services  
73 in all provinces of PNG, the current HIV counselling and testing rate, particularly among  
74 young people, falls within the national HIV strategic guidelines [22]. Their engagement further  
75 remains a challenge within the cascade of HIV services as well as access to sexual and  
76 reproductive health [26,27]. While understanding the drivers of HIV among this population  
77 remains multifaceted, the incidence and prevalence of HIV have been widely explored among

78 the general adult population [28–32] and key populations [33–35]. Among young men, prior  
79 studies have found that their attitudes toward HIV and sex are designed through dominant  
80 sociocultural narratives and understandings, and these influence their perceptions about  
81 sexual health, including sexually transmitted infections (STIs) and HIV [36]. HIV transmission  
82 can be prevented by recognizing and addressing the risks and protective factors associated  
83 with it.

84 In PNG, the evidence on targeted HIV prevention programs for young people is limited.  
85 Furthermore, the country has not reported nationally representative prevalence estimates or  
86 the distribution of young men who do not test for HIV. Such information would be important in  
87 developing targeted interventions and national-level policies for HIV prevention. The aim of  
88 this study was to estimate the prevalence of not testing for HIV and associated predictors  
89 among young men aged 15–24 years in PNG.

## 90 **Methods**

### 91 **Study design and sample**

92 We used secondary data from the 2016–2018 PNGDHS, a cross-sectional two-stage cluster  
93 sampling study representative of the entire country, for analysis. The survey used the list of  
94 census units (CUs) from the 2011 PNG National Population and Housing Census as the  
95 sampling frame [37]. Stratification of the sample was achieved by two categories: urban and  
96 rural areas, resulting in 43 sampling strata except for the National Capital District, which has  
97 no rural areas. In each stratum, samples of CUs were arbitrarily selected in two stages: The  
98 first stage involved the selection of 800 CUs, which was done using probability proportional to  
99 CU size. In the second stage, 24 households from each cluster were systematically selected  
100 through probability sampling, which yielded a total sample size of 19,200 households. The

101 selected sample consisted of 17,505 households. Of the total number of households selected,  
102 16,754 were occupied, and 16,021 were successfully interviewed (96% response rate) [38].  
103 Data were collected using two sets of validated questionnaires: household and (male)  
104 individual questionnaires. The dataset was created to analyze the HIV testing variable by  
105 merging the relevant information from these two questionnaires. Of the 7,333 men (aged 15–  
106 49 years) who participated in the interviews, 1,362 young men (aged 15–24 years), with  
107 variables of interest were included in the study, as shown in Fig 1. Details on the sampling  
108 technique, training of the survey team, household selection, survey questionnaires, and  
109 validation procedures are available in the final report [39].

110

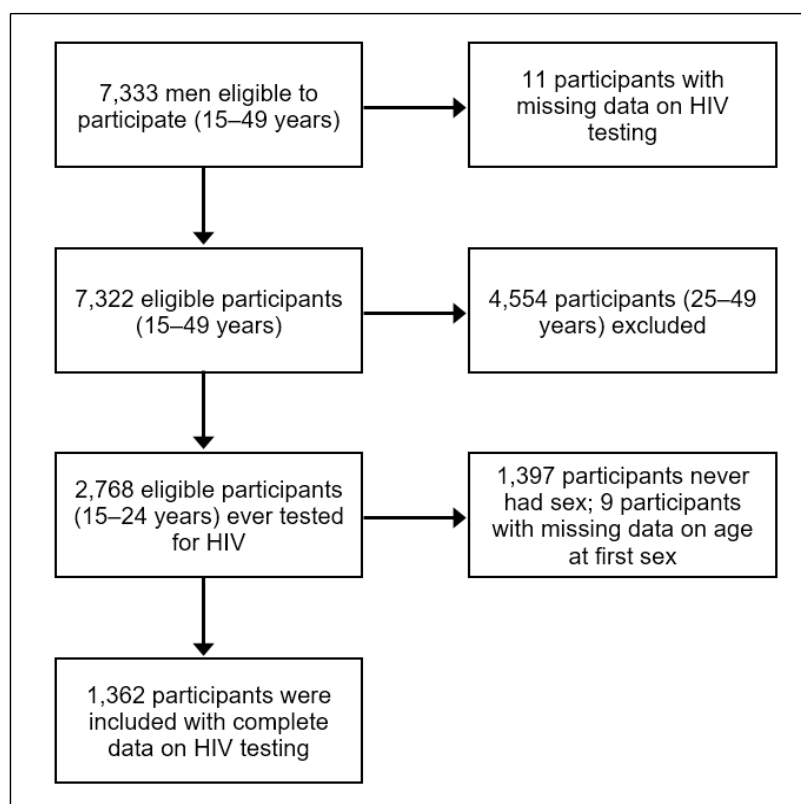

111

112

**Fig 1. Flowchart of sample selection**

## 113 **Study Variables**

114 The primary outcome variable of this study was “ever been tested for HIV?” and was coded  
115 as “0” for “no” or “1” for “yes.” The explanatory variables in this study were selected based on  
116 literature and their relevance [40–42] and were divided into three categories: socio-  
117 demographic characteristics (such as age group, marital status, educational level, occupation,  
118 wealth index, region, and place of residence); HIV-related knowledge (such as having ever  
119 heard of AIDS or STIs, can get HIV from mosquito bites, and knowing about the mother-to-  
120 child transmission (MTCT) of HIV during birth and through breastfeeding); and HIV-related  
121 factors (such as the age of sexual debut, number of sexual partners, had ever paid for sex,  
122 always use a condom, know a testing facility, ever tested for HIV, and had any STI in the last  
123 12 months). Other health-related risk behaviours measured included exposure to mass media  
124 (such as newspapers, magazines, radio, and television) and mobile phone ownership.

## 125 **Statistical analysis**

126 Our analyses were restricted to participants with complete data for the variables of interest.  
127 We performed descriptive statistics and bivariate analysis to explore the characteristics of the  
128 sample, which were presented as frequencies (the actual number of participants) and  
129 proportions (weighted %). Then we conducted a bivariate analysis to examine associations  
130 between the outcome variable (ever been tested for HIV) and selected explanatory variables.  
131 Variables with a significant p-value  $\leq 0.05$  were included in the multivariable logistic  
132 regression model. Finally, we performed a multivariable logistic regression analysis to  
133 determine predictors of not testing for HIV after adjusting for potential confounders. Complex  
134 data analysis techniques were employed to account for the multistage sampling used in the  
135 DHS. Adjusted odds ratios (AOR) with 95% confidence intervals (CI) were reported. All

136 statistical analyses were performed using IBM Statistical Package for the Social Sciences  
137 (SPSS), Version 26.0 (Armonk, NY: IBM Corp).

138 This work is reported under the STROBE guidelines for cross-sectional studies (included as  
139 S1 File) [43].

## 140 **Ethical Considerations**

141 The Institutional Review Board of ICF International and the PNG Medical Advisory Committee  
142 (MRAC), the National Department of Health, examined and approved the 2016–2018  
143 PNGDHS protocol. Informed consent was obtained from all participants before the survey  
144 was conducted. The datasets were de-identified, with no identifiable information on the survey  
145 participants when accessed for analysis. This study received a letter of approval from the  
146 DHS program.

## 147 **Results**

### 148 **Characteristics of the study population**

149 **Table 1** presents the participants' characteristics. Overall, 1,362 sexually active young men  
150 aged 15–24 years were enrolled in the study. More than three-quarters (82%) of young men  
151 lived in rural areas, and 73.7% of them were never married. Less than half of them had  
152 primary (44.3%) and secondary (45.4%) education, and 62% were not working at the time of  
153 the survey. Approximately 72% of the young men read newspapers or magazines and  
154 listened to the radio, and 57.8% owned mobile phones. Regarding HIV knowledge, almost all  
155 the young men had heard of acquired immunodeficiency syndrome (AIDS) (92.7%) and STIs  
156 (94.3%), and 70.8% of them knew about a testing facility. More than half knew about the  
157 MTCT of HIV during birth and by breastfeeding (65% and 54.6%, respectively). The majority,  
158 83.9%, of young men initiated sex before the age of 20, and 57.7% had multiple sexual

159 partners. Nearly one-third (27.7%) of young men do not always use condoms during sex.  
160 Young men who reported paying anyone for sex or having STIs in the last 12 months  
161 remained significantly low (5.1% and 5.3%, respectively).

162

**Table 1. Characteristics of the study population (N = 1,362)**

| <b>Variables</b>                    | <b>Frequency</b> | <b>(%)*</b> |
|-------------------------------------|------------------|-------------|
| <b><u>Demographics</u></b>          |                  |             |
| Age group (years)                   |                  |             |
| 15–19                               | 414              | (29.9)      |
| 20–24                               | 948              | (70.1)      |
| Marital status                      |                  |             |
| Never married                       | 1,011            | (73.7)      |
| Married                             | 321              | (24.3)      |
| Divorced/separated                  | 30               | (2.0)       |
| Education                           |                  |             |
| No formal education                 | 76               | (5.8)       |
| Primary                             | 614              | (44.3)      |
| Secondary                           | 632              | (45.4)      |
| Tertiary                            | 40               | (4.5)       |
| Occupation (n = 1,361)              |                  |             |
| Not working                         | 881              | (62.0)      |
| Working                             | 480              | (38.0)      |
| Wealth Index                        |                  |             |
| Poor                                | 330              | (29.3)      |
| Middle                              | 233              | (19.0)      |
| Rich                                | 799              | (51.7)      |
| Residence                           |                  |             |
| Urban                               | 453              | (18.0)      |
| Rural                               | 909              | (82.0)      |
| Read newspaper/magazine (n = 1,348) |                  |             |
| No                                  | 433              | (28.4)      |
| Yes                                 | 915              | (71.6)      |
| Listen to radio (n = 1,355)         |                  |             |
| No                                  | 412              | (28.3)      |
| Yes                                 | 943              | (71.7)      |



*Continued*

**Table 1. Characteristics of the study population (N = 1,362)**

| <b>Variables</b>                            | <b>Frequency</b> | <b>(%)*</b> |
|---------------------------------------------|------------------|-------------|
| Owns a mobile phone (n = 1,360)             |                  |             |
| No                                          | 628              | (42.2)      |
| Yes                                         | 732              | (57.8)      |
| <b><u>HIV knowledge</u></b>                 |                  |             |
| Ever heard of AIDS                          |                  |             |
| No                                          | 107              | (7.3)       |
| Yes                                         | 1,255            | (92.7)      |
| Ever heard of STI (n = 1,361)               |                  |             |
| No                                          | 86               | (5.7)       |
| Yes                                         | 1,275            | (94.3)      |
| Know HIV testing facility (n = 1,254)       |                  |             |
| No                                          | 349              | (29.2)      |
| Yes                                         | 905              | (70.8)      |
| Can get HIV from mosquito bites (n = 1,255) |                  |             |
| No or don't know                            | 970              | (76.6)      |
| Yes                                         | 285              | (23.4)      |
| MTCT during birth (n = 1,253)               |                  |             |
| No or don't know                            | 473              | (35.0)      |
| Yes                                         | 780              | (65.0)      |
| MTCT through breastfeeding (n = 1,251)      |                  |             |
| No or don't know                            | 552              | (45.4)      |
| Yes                                         | 699              | (54.6)      |
| <b><u>HIV-related risk factors</u></b>      |                  |             |
| Age of sexual debut (years)                 |                  |             |
| < 20                                        | 1,171            | (83.9)      |
| 20 or more                                  | 191              | (16.1)      |
| Number of sexual partners (n = 1,358)       |                  |             |
| 0–1                                         | 1,160            | (85.3)      |
| 2 or more                                   | 198              | (14.7)      |
| Paid for sex (n = 1,313)                    |                  |             |
| No                                          | 1,248            | (94.9)      |
| Yes                                         | 65               | (5.1)       |

*Continued*

**Table 1. Characteristics of the study population (N = 1,362)**

| Variables                                 | Frequency | (%)*   |
|-------------------------------------------|-----------|--------|
| Always use a condom (n = 1,249)           |           |        |
| No                                        | 354       | (27.7) |
| Yes                                       | 895       | (72.3) |
| Had any STIs (last 12 months) (n = 1,350) |           |        |
| No or don't know                          | 1,275     | (94.7) |
| Yes                                       | 75        | (5.3)  |
| Ever tested for HIV                       |           |        |
| No                                        | 1,103     | (82.7) |
| Yes                                       | 259       | (17.3) |

\*Weighted percentage (%); MTCT – Mother-to-Child Transmission of HIV.

163

164 **The prevalence of ever being tested for HIV**

165 The overall prevalence of having been tested for HIV among young men was 17.3% (95% CI:  
166 0.15–0.19), whereas having not been tested was 82.7% (95% CI: 0.81–0.85), as reported in

167 **Table 1.** Across the region, the prevalence of HIV testing remained low and differed

168 significantly, ranging from 11% in the Momase region to 21.9% in the Highlands region, as

169 shown in **Fig 2.**

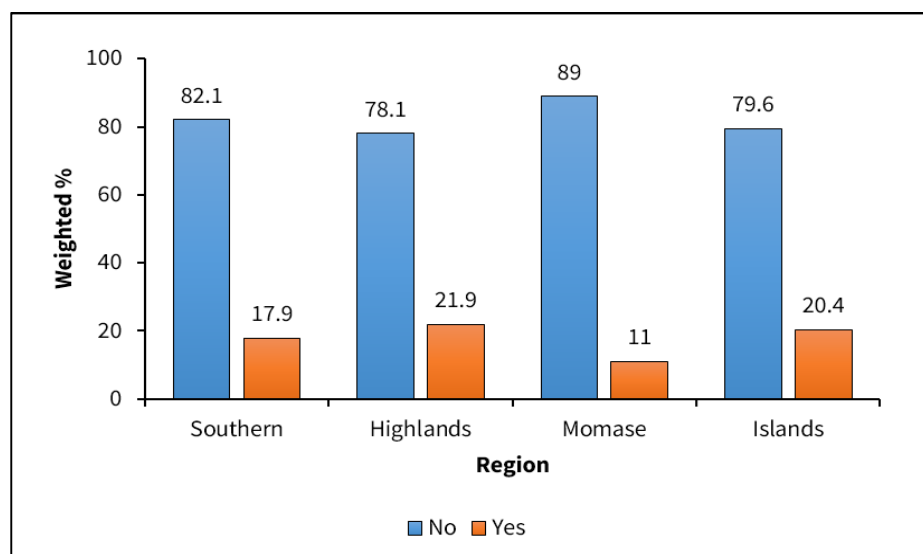

170

171

**Fig 2. The prevalence of ever tested for HIV among young men by region in PNG.**

172 **Bivariate analysis of ever been tested for HIV**

173 **Table 2** shows the association between demographic characteristics, HIV knowledge, related  
 174 risk factors, and having ever been tested for HIV among young people in PNG. In the  
 175 bivariate analysis, having not been tested for HIV remained higher among young men aged  
 176 20–24 (68.3%), never been married (75.6%), had a primary education (46.4%), not working  
 177 (63.8%), and living in rural areas (84%). Furthermore, having not been tested for HIV was  
 178 common among young men who read newspapers/magazines (69.5%), listened to the radio  
 179 (70.1%), and owned a mobile phone (54.8%). Over half (52.7%) of those who knew about the  
 180 MTCT of HIV through breastfeeding did not test for HIV. The number of sexual partners ( $p =$   
 181 0.003), paying anyone for sex ( $p = 0.001$ ), always using a condom during sex ( $p = 0.018$ ), and  
 182 having any STIs in the last 12 months ( $p < 0.001$ ) were all statistically significant variables in  
 183 HIV-related risk factors.

184

**Table 2. Bivariate analysis of ever been tested for HIV among young men (15–24 years) in PNG (N = 1,362)**

| Variables                         | HIV testing                   |                                | p-value           |
|-----------------------------------|-------------------------------|--------------------------------|-------------------|
|                                   | No, <i>n</i> (%) <sup>*</sup> | Yes, <i>n</i> (%) <sup>*</sup> |                   |
| <b><u>Demographic factors</u></b> |                               |                                |                   |
| Age group (years)                 |                               |                                | <b>0.004</b>      |
| 15–19                             | 355 (31.7)                    | 59 (21.9)                      |                   |
| 20–24                             | 748 (68.3)                    | 200 (78.1)                     |                   |
| Marital status                    |                               |                                | <b>0.003</b>      |
| Never married                     | 838 (75.6)                    | 173 (64.6)                     |                   |
| Married                           | 243 (22.6)                    | 78 (32.3)                      |                   |
| Divorced/separated                | 22 (1.8)                      | 8 (3.1)                        |                   |
| Education                         |                               |                                | <b>&lt; 0.001</b> |
| No formal education               | 70 (6.6)                      | 6 (2.2)                        |                   |
| Primary                           | 533 (46.4)                    | 81 (33.9)                      |                   |
| Secondary                         | 477 (42.7)                    | 155 (58.0)                     |                   |
| College                           | 23 (4.3)                      | 17 (5.8)                       |                   |

*Continued*

**Table 2. Bivariate analysis of ever been tested for HIV among young men (15–24 years) in PNG (N = 1,362)**

| Variables                                   | HIV testing                   |                                | p-value           |
|---------------------------------------------|-------------------------------|--------------------------------|-------------------|
|                                             | No, <i>n</i> (%) <sup>*</sup> | Yes, <i>n</i> (%) <sup>*</sup> |                   |
| Occupation (n = 1,361)                      |                               |                                | <b>0.004</b>      |
| Not working                                 | 735 (63.8)                    | 146 (53.6)                     |                   |
| Working                                     | 367 (36.2)                    | 113 (46.4)                     |                   |
| Wealth Index                                |                               |                                | <b>&lt; 0.001</b> |
| Poor                                        | 298 (31.7)                    | 32 (17.9)                      |                   |
| Middle                                      | 193 (18.8)                    | 40 (20.2)                      |                   |
| Rich                                        | 612 (49.5)                    | 187 (61.9)                     |                   |
| Residence                                   |                               |                                | <b>&lt; 0.001</b> |
| Urban                                       | 339 (16.0)                    | 114 (27.2)                     |                   |
| Rural                                       | 764 (84.0)                    | 145 (72.8)                     |                   |
| Read newspaper/magazine (n = 1,348)         |                               |                                | <b>&lt; 0.001</b> |
| No                                          | 381 (30.5)                    | 52 (18.8)                      |                   |
| Yes                                         | 708 (69.5)                    | 207 (81.3)                     |                   |
| Listen to radio (n = 1,355)                 |                               |                                | <b>0.008</b>      |
| No                                          | 353 (29.9)                    | 59 (21.1)                      |                   |
| Yes                                         | 745 (70.1)                    | 198 (78.9)                     |                   |
| Own a mobile phone (n = 1,360)              |                               |                                | <b>&lt; 0.001</b> |
| No                                          | 549 (45.2)                    | 79 (27.8)                      |                   |
| Yes                                         | 552 (54.8)                    | 180 (72.2)                     |                   |
| <b><u>HIV knowledge</u></b>                 |                               |                                |                   |
| Can get HIV from mosquito bites (n = 1,255) |                               |                                | 0.183             |
| No or don't know                            | 783 (77.4)                    | 187 (73.2)                     |                   |
| Yes                                         | 213 (22.6)                    | 72 (26.8)                      |                   |
| MTCT during birth (n = 1,253)               |                               |                                | 0.187             |
| No or don't know                            | 390 (34.2)                    | 83 (38.8)                      |                   |
| Yes                                         | 604 (65.8)                    | 176 (61.2)                     |                   |
| MTCT by breastfeeding (n = 1,251)           |                               |                                | <b>0.005</b>      |
| No or don't know                            | 463 (47.3)                    | 89 (36.9)                      |                   |
| Yes                                         | 531 (52.7)                    | 168 (63.1)                     |                   |

*Continued*

**Table 2. Bivariate analysis of ever been tested for HIV among young men (15–24 years) in PNG (N = 1,362)**

| Variables                                 | HIV testing                   |                                | p-value           |
|-------------------------------------------|-------------------------------|--------------------------------|-------------------|
|                                           | No, <i>n</i> (%) <sup>*</sup> | Yes, <i>n</i> (%) <sup>*</sup> |                   |
| <b><u>HIV-related factors</u></b>         |                               |                                |                   |
| Age of sexual debut (years)               |                               |                                | 0.411             |
| < 20                                      | 946 (83.5)                    | 225 (85.7)                     |                   |
| 20 or more                                | 157 (16.5)                    | 34 (14.3)                      |                   |
| Number of sexual partners (n = 1,358)     |                               |                                | <b>0.003</b>      |
| 0–1                                       | 946 (86.7)                    | 214 (78.9)                     |                   |
| 2 or more                                 | 153 (13.3)                    | 45 (21.1)                      |                   |
| Paid for sex (n = 1,313)                  |                               |                                | <b>&lt; 0.001</b> |
| No                                        | 1,022 (96.3)                  | 226 (94.9)                     |                   |
| Yes                                       | 41 (3.7)                      | 24 (5.1)                       |                   |
| Always use a condom (n = 1,249)           |                               |                                | <b>0.018</b>      |
| No                                        | 271 (26.2)                    | 83 (34.1)                      |                   |
| Yes                                       | 719 (73.8)                    | 176 (65.9)                     |                   |
| Had any STIs (last 12 months) (n = 1,350) |                               |                                | <b>&lt; 0.001</b> |
| No or don't know                          | 1,041 (95.8)                  | 234 (89.7)                     |                   |
| Yes                                       | 50 (4.2)                      | 25 (10.3)                      |                   |

<sup>\*</sup>Weighted percentage (%); MTCT – Mother-to-Child Transmission of HIV; Chi-square (p ≤ 0.05).

185

186 **Multivariable analysis of predictors of not testing for HIV**

187 **Table 3** presents adjusted predictors of not testing for HIV. Marital status, mobile phone

188 ownership, having ever paid anyone for sex, always using a condom during sex, and having

189 any STI in the last 12 months were significant predictors of not testing. In the multivariable

190 analysis, young men who were never married (AOR 1.88; 95% CI: 1.19–2.96), who did not

191 own a mobile phone (AOR 1.79; 95% CI: 1.17–2.77), who had not paid anyone for sex (AOR

192 2.82; 95% CI: 1.29–6.14), and who had no STIs or did not know (AOR 1.97; 95% CI: 1.00–

193 3.85) had higher odds of not being tested for HIV. In contrast, young men who did not always

194 use a condom during sex (AOR 0.62; 95% CI: 0.39–0.96) had lower odds of not being tested  
 195 for HIV.

196

**Table 3. Multivariable logistic regression analysis of predictors of not testing for HIV among young men (15–24 years) in PNG (N = 1,362)**

| <b>Variables</b>          | <b>AOR (95% CI)</b> | <b>p-value</b> |
|---------------------------|---------------------|----------------|
| Age group (years)         |                     | 0.413          |
| 15–19                     | 1.24 (0.74–2.06)    |                |
| 20–24                     | 1                   |                |
| Marital status            |                     | <b>0.017</b>   |
| Married                   | 1                   |                |
| Never married             | 1.88 (1.19–2.96)    |                |
| Divorced/separated        | 0.97 (0.29–3.24)    |                |
| Education                 |                     | 0.882          |
| No formal education       | 1.15 (0.25–5.31)    |                |
| Primary                   | 0.92 (0.33–2.55)    |                |
| High/Secondary            | 0.79 (0.28–2.22)    |                |
| College/Tertiary          | 1                   |                |
| Occupation                |                     | 0.148          |
| Not working               | 1.40 (0.89–2.21)    |                |
| Working                   | 1                   |                |
| Wealth Index              |                     | 0.234          |
| Poor                      | 1.47 (0.78–2.79)    |                |
| Middle                    | 0.82 (0.42–1.61)    |                |
| Rich                      | 1                   |                |
| Residence                 |                     | 0.077          |
| Urban                     | 1                   |                |
| Rural                     | 1.60 (0.95–2.69)    |                |
| Read a newspaper/magazine |                     | 0.287          |
| No                        | 1.32 (0.79–2.20)    |                |
| Yes                       | 1                   |                |
| Listen to radio           |                     | 0.978          |
| No                        | 0.99 (0.61–1.62)    |                |
| Yes                       | 1                   |                |
| Owns a mobile phone       |                     | <b>0.008</b>   |
| No                        | 1.79 (1.17–2.77)    |                |
| Yes                       | 1                   |                |
| MTCT by breastfeeding     |                     | 0.087          |
| No or don't know          | 1.45 (0.95–2.22)    |                |
| Yes                       | 1                   |                |

*Continued*

**Table 3. Multivariable logistic regression analysis of predictors of not testing for HIV among young men (15–24 years) in PNG (N = 1,362)**

| <b>Variables</b>             | <b>AOR (95% CI)</b> | <b>p-value</b> |
|------------------------------|---------------------|----------------|
| Number of sexual partners    |                     | 0.184          |
| 0–1                          | 1.41 (0.85–2.33)    |                |
| 2 or more                    | 1                   |                |
| Paid for sex                 |                     | <b>0.009</b>   |
| No                           | 2.82 (1.29–6.14)    |                |
| Yes                          | 1                   |                |
| Always use a condom          |                     | <b>0.033</b>   |
| No                           | 0.62 (0.39–0.96)    |                |
| Yes                          | 1                   |                |
| Had any STI (last 12 months) |                     | <b>0.049</b>   |
| No or don't know             | 1.97 (1.00–3.85)    |                |
| Yes                          | 1                   |                |

1 – Reference Category; AOR – Adjusted Odds Ratio; CI – Confidence Interval; MTCT – Mother-to-Child Transmission of HIV.

197

198

## **Discussion**

199

This study assessed the prevalence and predictors of not testing for HIV among young men

200

aged 15–24 years in PNG. Our study found a statistically significant association between

201

marital status, mobile phone ownership, having paid anyone for sex, always using a condom

202

during sex, and having any STI and not testing for HIV among young men ( $p < 0.05$ ). The

203

prevalence of testing for HIV among young men in this study was much lower (17.3%)

204

compared to those who were not tested. In addition, the prevalence of not testing for HIV

205

differed significantly by region, ranging from 78.1% in the Highlands to 89% in the Momase.

206

These results were consistent with the literature [40]. The difference in HIV testing could be

207

interpreted in the context of young men's risk behaviours and whether HIV services are

208

accessible in each region. Given the high HIV prevalence (0.9%) in the country [20], the low

209 HIV testing rates among this group are a concern. This study offers insights into HIV testing  
210 among young men living in a high HIV prevalence setting.

211 Our study found a significantly lower prevalence of HIV testing among young men than in  
212 studies conducted in Nigeria [40] and the Gambia [41]; however, these findings contributed to  
213 a better understanding of the current HIV prevention challenges among young men in PNG.  
214 The low rates of HIV testing found in this study show only a minimal decrease in the HIV  
215 testing uptake in this age group when compared to the country's recent data [39]. While the  
216 reasons are unclear, there is growing evidence that low uptake of HIV testing in this  
217 population is impeded by the inaccessibility of HIV services, confidentiality and disclosure  
218 issues, stigma, the perceived risk of sexual exposure, poor social support, and the attitudes of  
219 health workers [44–47]. This provides a plausible explanation for the low uptake of HIV  
220 testing, with increased HIV vulnerability suggesting possible transmission among the study  
221 population. Young people, who remain most vulnerable to HIV acquisition and transmission,  
222 seem to have minimal attention [3,12]. This finding is still implausible given UNAIDS'  
223 ambitious goals to end the HIV epidemic by 2030 [11]. Given the importance of timely HIV  
224 diagnosis, treatment, and retention in care [48,49], there is a need for specific policy  
225 frameworks that focus on strengthening HIV prevention while simultaneously addressing  
226 social and contextual barriers to access and uptake of HIV among young men in PNG.

227 While education was not statistically related to not testing for HIV in our study, in similar  
228 studies from South Africa [10] and The Gambia [41], educational attainment and HIV  
229 knowledge were found to be significant predictors of HIV testing among young people. We  
230 further found that the odds of not testing remained high among young men with low  
231 educational attainment and unemployment. This association may imply that, as previously  
232 reported [40,41,50], a lack of HIV knowledge and a low wealth index were recognized as



233 barriers to HIV prevention, care, and treatment efforts, as well as engagement in risky sexual  
234 behaviours. Such low rates of testing and lack of HIV knowledge increase the possibility that  
235 this group is unaware of their HIV-positive statuses and may, therefore, accidentally transmit  
236 HIV to others. However, there is increasing evidence that higher education attainment and  
237 HIV knowledge are potential proxy measures for HIV prevention [51,52]. Knowledge of HIV  
238 and disclosure status remains a critical step in the HIV prevention cascade, particularly  
239 among young people, as it has been associated with reducing risky behaviours among the  
240 most at-risk population, including those who have HIV [51,53]. As the availability of HIV  
241 testing services expands to meet the demand for HIV incidence reduction in PNG, more  
242 alternative HIV testing models are required to increase testing for HIV among young men. Our  
243 study suggests that effective, innovative pedagogy for sexual and reproductive health  
244 education and youth-friendly initiatives are required to stimulate positive sexual behaviour and  
245 increase the uptake of HIV testing in this population.

246 Our findings revealed that significant proportions of young men in rural areas were not tested  
247 for HIV, a finding comparable to studies in other countries [40,41]. It is not surprising that  
248 access to and utilization of HIV testing services in rural areas were low in this study, which  
249 could be construed in terms of their diffusion, including societal norms and perceptions about  
250 HIV. Recent studies showed that HIV testing options in rural areas are frequently impeded by  
251 stigma and disclosure issues, including limited access, under-resourcing, and the cost of  
252 services that may lead to delays in testing [46,54,55], an area that needs further investigation  
253 in PNG's context. The WHO guidelines have highlighted the need for strategic and novel  
254 approaches to implement HIV testing services for hard-to-reach populations, such as self-  
255 testing and community-based HIV testing [56]. These strategies are suggested as having the  
256 potential to increase testing uptake, especially among young people who would not normally

257 access HIV testing services [44,57]. Increasing self-testing and mobile community-based HIV  
258 testing should continue to be expanded as complementary approaches, especially in rural  
259 areas where HIV testing is low and health disparities are more pronounced.

260 Regarding mobile phone ownership, more than half (57.8%) of young men who owned mobile  
261 phones were not tested for HIV in this study. Our study did not explore the relationships  
262 between mobile phones and HIV testing. However, mobile phones in healthcare have shown  
263 promising results in a hard-to-reach population for HIV prevention [58–60]. Mobile phones can  
264 be used as mediums for preventing HIV in young people and serving as reminders for health  
265 action, reinforcing sexual risk reduction skills, increasing HIV knowledge, and linking them to  
266 HIV testing [58,60]. Studies evaluating the mobile phone's efficacy in health care have shown  
267 that it increases HIV testing, condom use, and HIV/STI knowledge among young people [61].  
268 Furthermore, mobile phones could be feasible for addressing complex intersecting barriers in  
269 the HIV continuum to improve optimal outcomes for young men. Recent evidence suggests  
270 that mobile phone technologies can potentially help overcome barriers associated with low  
271 HIV testing uptake among young men, including stigmatization, discrimination, fear of refusal,  
272 lack of privacy and confidentiality, and embarrassment in seeking sexual health services, by  
273 providing safe, cost-effective, and tailored prevention interventions [58,62]. Our study  
274 underscores the urgency for innovative strategies to reach and deliver HIV prevention  
275 services to young people—a most at-risk population with suboptimal engagement in HIV  
276 prevention programs. This study further highlights the significance of a formative evaluation  
277 concerning the feasibility and acceptability of mobile phone-based HIV prevention  
278 interventions.

279 In this study, we found that having paid anyone for sex was a statistically significant predictor  
280 of not testing for HIV. Those who did not pay for sex were almost three times (AOR 2.83)

281 more likely to not be tested for HIV compared to their counterparts. This finding is different  
282 from another study, which reported that having paid for sex was associated with low HIV  
283 testing rates (26.4%) [63]. Young men who participate in high-risk sexual activities may not  
284 accurately perceive their HIV risk; therefore, they report low rates of HIV testing and do not  
285 consistently use condoms during sex. Risk perception issues may as well explain the  
286 interesting finding that young men who were sexually active but had not paid for sex reported  
287 statistically significant rates of not testing for HIV. The fact that young men are engaging in  
288 risky behaviours such as paying for sex may indicate that their overall perception of risk is  
289 different from that of those who are not participating in these behaviours [12,52]. Additionally,  
290 the higher odds of not being tested for HIV among this group compared to those who paid for  
291 sex could be due to a fear of disclosing their social identities (i.e., male sex workers or men  
292 who have sex with men), experiencing stigma and discrimination, including accessing HIV  
293 treatment and care if HIV-positive, as previously reported in studies [50,64]. This is one  
294 possible explanation, which is why they masked their social identities during the survey. While  
295 the data in this study did not identify young men as key populations, there is empirical  
296 evidence that they engage in transactional sex [4,6,63]. In PNG, transactional sex is unlawful,  
297 but the practice is prevalent [35], and this, along with other structural barriers, may have  
298 limited young men's access to HIV testing services. Innovative risk reduction and behaviour  
299 change interventions are needed to address this gap in this population.

300 Our study showed that less than a quarter (26.2%) of young men do not always use condoms  
301 during sex compared to their counterparts. Our findings are consistent with those from Brazil  
302 [14] and Indonesia [16], showing low rates of condom use among young people (22.8% and  
303 27.4%, respectively). Low and sporadic use of condoms has been linked with poor knowledge  
304 of HIV and sexual health education, which are potential risk factors for HIV transmission

305 [13,15]. The high proportion of young men with primary education in this study suggests that  
306 this could be one possible explanation for low condom use. Another reason accounting for  
307 this finding could be the result of the multifaceted array of individual- and interpersonal-level  
308 influences on condom use among young people. There is evidence that unequal gender and  
309 social norms, peer influences, negative perceptions about condoms and their use, and poor  
310 youth-friendly sexual and reproductive health services have been associated with low and  
311 inconsistent condom use among young people [16,65]. However, consistent condom use has  
312 been acknowledged as one of the most fundamental preventative measures against HIV  
313 acquisition and transmission [13]. In other recent studies, rates of consistent condom use  
314 have been shown to increase with higher levels of education and comprehensive sexual  
315 health education [15,17,66]. Approaches aimed at improving consistent condom use among  
316 young men should consider multi-level influences, including attitudes and decisions around  
317 condom use. Our findings suggest that comprehensive information, education, and  
318 communication on condom self-efficacy could increase condom use and attitudes toward its  
319 use among this population.

## 320 **Study strengths and limitations**

321 The findings reported in this study have some limitations. First, results from this study should  
322 be interpreted with caution as it was restricted to young people (aged 15–24 years) only,  
323 limiting the generalizability to a wider population. Second, data discrepancies from the  
324 selected samples may be a limitation since secondary data was utilized for this study. For  
325 instance, there was a wide variation in the selected samples, more so in females than males.  
326 Third, considering the age of the study sample, questions relating to their sexual behaviours  
327 may have resulted in recall bias. Fourth, discussions around the subject of sexuality are  
328 sensitive and perceived as taboo in some societies, which may have led to underreporting or

329 overreporting. Nevertheless, the findings of the study are based on nationally representative  
330 survey data, which provided insights on predictors of not testing for HIV among young men.  
331 The study offers significant information for optimizing HIV prevention programs that target  
332 young people in the country.

## 333 **Conclusion**

334 Our study found that HIV testing among young men remained significantly low in PNG,  
335 suggesting an unmet need for targeted HIV prevention programs. Young men were less likely  
336 to get tested for HIV if they were unmarried, had no formal education, were unemployed, were  
337 from rural areas, did not have mobile phones, did not pay for sex, did not always use a  
338 condom during sex, and did not know they had any STIs. Efforts to increase HIV testing  
339 should include novel prevention approaches to supplement the current national HIV  
340 prevention services and address this shortfall. Improving access to HIV testing services,  
341 particularly for rural young men, may further increase self-testing uptake and their acceptance  
342 of treatment and care. Additionally, youth-oriented health services should be prioritized with a  
343 focus on improving HIV knowledge, risk reduction, and behaviour change among young men  
344 in this setting.

345

## 346 **Supporting information**

347 The STROBE guidelines for cross-sectional studies (included as S1 File).

## 348 **Declarations**

## 349 **Authors' contributions**

350 MKM: Conceived and designed the experiments; Performed the analysis and interpreted the  
351 data; Wrote the manuscript. The author read and approved the final manuscript.

## 352 **Funding**

353 This research received no specific grant from any funding agency in the public, commercial,  
354 or not-for-profit sectors.

## 355 **Availability of Data and Materials**

356 The 2016–2016 PNGDHS dataset used in this study is not publicly available since the author  
357 received a data access letter from the DHS specific to the project, but is available from the  
358 DHS team upon request at <https://dhsprogram.com/>

## 359 **Conflict of Interest**

360 The author declares that there are no competing interests.

## 361 **Acknowledgments**

362 I would like to thank the Measure DHS program and its partners for permitting me to analyze  
363 the 2016–2018 PNGDHS data.

## 364 **References**

- 365 [1] UNAIDS. Global HIV statistics: Fact sheet 2022 2022.
- 366 [2] UNAIDS. Young people and HIV. Geneva, Switzerland: UNAIDS; 2021.
- 367 [3] Koenig LJ, Hoyer D, Purcell DW, Zaza S, Mermin J. Young People and HIV: A Call to  
368 Action. *Am J Public Health* 2016;106:402–5. <https://doi.org/10.2105/AJPH.2015.302979>.
- 369 [4] Bekker L-G, Hosek S. HIV and adolescents: focus on young key populations. *J Int AIDS*  
370 *Soc* 2015;18:20076. <https://doi.org/10.7448/IAS.18.2.20076>.
- 371 [5] Khalifa A, Stover J, Mahy M, Idele P, Porth T, Lwamba C. Demographic change and HIV  
372 epidemic projections to 2050 for adolescents and young people aged 15-24. *Null*  
373 *2019;12:1662685*. <https://doi.org/10.1080/16549716.2019.1662685>.
- 374 [6] UNAIDS. Putting young key populations first — HIV and young people from key  
375 populations in the Asia and Pacific region 2022. Geneva, Switzerland: 2022.
- 376 [7] UNICEF. Adolescent HIV prevention: Turning the tide against AIDS will require more  
377 concentrated focus on adolescents and young people 2020.  
378 <https://data.unicef.org/topic/hivaids/adolescents-young-people/>.

- 379 [8] Ajayi AI, Awopegba OE, Adeagbo OA, Ushie BA. Low coverage of HIV testing among  
380 adolescents and young adults in Nigeria: Implication for achieving the UNAIDS first 95.  
381 PLOS ONE 2020;15:e0233368. <https://doi.org/10.1371/journal.pone.0233368>.
- 382 [9] Kim S-H, Gerver SM, Fidler S, Ward H. Adherence to antiretroviral therapy in  
383 adolescents living with HIV: systematic review and meta-analysis. AIDS 2014;28:1945–  
384 56. <https://doi.org/10.1097/QAD.0000000000000316>.
- 385 [10] Peltzer K, Matseke G. Determinants of HIV testing among young people aged 18 - 24  
386 years in South Africa. Afr Health Sci 2013;13:1012–20.  
387 <https://doi.org/10.4314/ahs.v13i4.22>.
- 388 [11] Wong VJ, Murray KR, Phelps BR, Vermund SH, McCarraher DR. Adolescents, young  
389 people, and the 90-90-90 goals: a call to improve HIV testing and linkage to treatment.  
390 AIDS 2017;31 Suppl 3:S191–4. <https://doi.org/10.1097/QAD.0000000000001539>.
- 391 [12] Manu A, Ogum-Alangea D, Azilaku JC, Anaba EA, Torpey K. Risky sexual behaviours  
392 and HIV testing among young people in Ghana: evidence from the 2017/2018 Multiple  
393 Indicator Cluster Survey. Reproductive Health 2022;19:125.  
394 <https://doi.org/10.1186/s12978-022-01439-1>.
- 395 [13] Mhlongo S, Dietrich J, Otwombe KN, Robertson G, Coates TJ, Gray G. Factors  
396 Associated with Not Testing For HIV and Consistent Condom Use among Men in  
397 Soweto, South Africa. PLOS ONE 2013;8:e62637.  
398 <https://doi.org/10.1371/journal.pone.0062637>.
- 399 [14] Felisbino-Mendes MS, Araújo FG, Oliveira LVA, Vasconcelos NM de, Vieira MLFP, Malta  
400 DC. Sexual behaviors and condom use in the Brazilian population: analysis of the  
401 National Health Survey, 2019. Rev Bras Epidemiol 2021;24:e210018.  
402 <https://doi.org/10.1590/1980-549720210018.supl.2>.
- 403 [15] Bolarinwa OA, Ajayi KV, Sah RK. Association between knowledge of Human  
404 Immunodeficiency Virus transmission and consistent condom use among sexually active  
405 men in Nigeria: An analysis of 2018 Nigeria Demographic Health Survey. PLOS Glob  
406 Public Health 2022;2:e0000223. <https://doi.org/10.1371/journal.pgph.0000223>.
- 407 [16] Putra IGNE, Astuti D, Widyastari DA, Phuengsamran D. Prevalence and determinants of  
408 condom use among male adolescents in Indonesia 2021;33.  
409 <https://doi.org/10.1515/ijamh-2018-0141>.
- 410 [17] Finigan-Carr NM, Craddock JB, Johnson T. Predictors of condom use among system-  
411 involved youth: The importance of Sex Ed. Children and Youth Services Review  
412 2021;127:106130. <https://doi.org/10.1016/j.childyouth.2021.106130>.
- 413 [18] World Health Organization. Consolidated guidelines on HIV testing services, 2019 2020.
- 414 [19] UNAIDS. Understanding Fast-Track: Accelerating action to end the AIDS Epidemic by  
415 2030. Geneva, Switzerland: 2015.
- 416 [20] UNAIDS. UNAIDS Data 2021. Geneva, Switzerland: UNAIDS; 2021.

- 417 [21] UNAIDS. Country Factsheet: HIV and AIDS Estimates 2021. Country: Papua New  
418 Guinea 2022. <https://www.unaids.org/en/regionscountries/countries/papuanewguinea>.
- 419 [22] NACS. Papua New Guinea National STI and HIV Strategy 2018-2022. Port Moresby,  
420 Papua New Guinea: 2018.
- 421 [23] Gare J, Kelly-Hanku A, Ryan CE, David M, Kaima P, Imara U, et al. Factors Influencing  
422 Antiretroviral Adherence and Virological Outcomes in People Living with HIV in the  
423 Highlands of Papua New Guinea. *PLoS One* 2015;10:e0134918–e0134918.  
424 <https://doi.org/10.1371/journal.pone.0134918>.
- 425 [24] Man WYN, Kelly A, Worth H, Frankland A, Shih P, Kupul M, et al. Sexual risk behaviour,  
426 marriage and ART: a study of HIV-positive people in Papua New Guinea. *AIDS*  
427 *Research and Therapy* 2013;10:17. <https://doi.org/10.1186/1742-6405-10-17>.
- 428 [25] Worth H. HIV Prevention in Papua New Guinea: Is It Working or Not? *World Journal of*  
429 *AIDS* 2012;2:117.
- 430 [26] Baigry MI, Ray R, Lindsay D, Kelly-Hanku A, Redman-MacLaren M. Barriers and  
431 enablers to young people accessing sexual and reproductive health services in Pacific  
432 Island Countries and Territories: A scoping review. *PLOS ONE* 2023;18:e0280667.  
433 <https://doi.org/10.1371/journal.pone.0280667>.
- 434 [27] Gray N, Azzopardi P, Kennedy E, Willersdorf E, Creati M. Improving Adolescent  
435 Reproductive Health in Asia and the Pacific: Do We Have the Data? A Review of DHS  
436 and MICS Surveys in Nine Countries. *Asia Pac J Public Health* 2013;25:134–44.  
437 <https://doi.org/10.1177/1010539511417423>.
- 438 [28] Kelly-Hanku A, Nightingale CE, Pham MD, Mek A, Homiehombo P, Bagita M, et al. Loss  
439 to follow up of pregnant women with HIV and infant HIV outcomes in the prevention of  
440 maternal to child transmission of HIV programme in two high-burden provinces in Papua  
441 New Guinea: a retrospective clinical audit. *BMJ Open* 2020;10:e038311.  
442 <https://doi.org/10.1136/bmjopen-2020-038311>.
- 443 [29] Maviso M. Sociodemographic characteristics of people tested HIV-positive by notifying  
444 testing facilities in Papua New Guinea, 2010-2014: A descriptive analysis. *Papua New*  
445 *Guinea Medical Journal* 2020;63:132–43.
- 446 [30] Persson A, Kelly-Hanku A, Mek A, Mitchell E, Nake Trumb R, Worth H, et al. Polygyny,  
447 Serodiscordance and HIV Prevention in Papua New Guinea: A Qualitative Exploration of  
448 Diverse Configurations. *Null* 2020;21:248–63.  
449 <https://doi.org/10.1080/14442213.2020.1758202>.
- 450 [31] Persson A, Kelly-Hanku A, Mek A, Mitchell E, Nake Trumb R, Worth H, et al. Making  
451 Sense of Serodiscordance: Pathways and Aftermaths of HIV Testing among Couples  
452 with Mixed HIV Status in Papua New Guinea. *The Asia Pacific Journal of Anthropology*  
453 2021;22:298–314. <https://doi.org/10.1080/14442213.2021.1942184>.



- 454 [32] Vallely A, Ryan CE, Allen J, Sauk JC, Simbiken CS, Wapling J, et al. High prevalence  
455 and incidence of HIV, sexually transmissible infections and penile foreskin cutting among  
456 sexual health clinic attendees in Papua New Guinea. *Sex Health* 2014;11:58–66.
- 457 [33] Hakim AJ, Coy K, Badman SG, Willie B, Narokobi R, Gabuzzi J, et al. One size does not  
458 fit all: HIV prevalence and correlates of risk for men who have sex with men, transgender  
459 women in multiple cities in Papua New Guinea. *BMC Public Health* 2019;19:623.  
460 <https://doi.org/10.1186/s12889-019-6942-7>.
- 461 [34] Kelly-Hanku A, Willie B, Weikum D, Boli Neo R, Kupul M, Coy K. Kauntim mi tu: Multi-  
462 site summary report from the key population integrated bio-behavioural survey, Papua  
463 New Guinea. Goroka: Papua New Guinea Institute of Medical Research and Kirby  
464 Institute, UNSW Sydney 2018.
- 465 [35] Weikum D, Kelly-Hanku A, Hou P, Kupul M, Amos-Kuma A, Badman SG, et al. Kuantim  
466 mi tu (“Count me too”): Using Multiple Methods to Estimate the Number of Female Sex  
467 Workers, Men Who Have Sex With Men, and Transgender Women in Papua New  
468 Guinea in 2016 and 2017. *JMIR Public Health Surveill* 2019;5:e11285.  
469 <https://doi.org/10.2196/11285>.
- 470 [36] Kelly A, Akuani F, Kepa B, Pirpir L, Mek A, Kupul M, et al. Young people’s attitudes  
471 towards sex and HIV in the Eastern Highlands of Papua New Guinea. Monograph  
472 2008;1.
- 473 [37] National Statistical Office [PNG]. 2011 National Population and Housing Census of  
474 Papua New Guinea. Port Moresby, Papua New Guinea: 2013.
- 475 [38] National Statistical Office [PNG], ICF. Papua New Guinea Demographic and Health  
476 Survey 2016-18. Port Moresby, Papua New Guinea & Rockville, Maryland, USA: NSO &  
477 ICF; 2019.
- 478 [39] National Statistical Office (NSO) [Papua New Guinea], ICF. Papua New Guinea  
479 Demographic and Health Survey 2016-18. Port Moresby, Papua New Guinea, and  
480 Rockville, Maryland, USA: NSO and ICF; 2019.
- 481 [40] Ajayi AI, Awopegba OE, Adeagbo OA, Ushie BA. Low coverage of HIV testing among  
482 adolescents and young adults in Nigeria: Implication for achieving the UNAIDS first 95.  
483 *PLOS ONE* 2020;15:e0233368. <https://doi.org/10.1371/journal.pone.0233368>.
- 484 [41] Sonko I, Chung M-H, Hou W-H, Chen W-T, Chang P-C. Predictors of HIV testing among  
485 youth aged 15–24 years in The Gambia. *PLOS ONE* 2022;17:e0263720.  
486 <https://doi.org/10.1371/journal.pone.0263720>.
- 487 [42] Asaolu IO, Gunn JK, Center KE, Koss MP, Iwelunmor JI, Ehiri JE. Predictors of HIV  
488 Testing among Youth in Sub-Saharan Africa: A Cross-Sectional Study. *PLOS ONE*  
489 2016;11:e0164052. <https://doi.org/10.1371/journal.pone.0164052>.
- 490 [43] Cuschieri S. The STROBE guidelines. *Saudi Journal of Anaesthesia* 2019;13:S31.  
491 [https://doi.org/10.4103%2Fsja.SJA\\_543\\_18](https://doi.org/10.4103%2Fsja.SJA_543_18).

- 492 [44] Indravudh PP, Sibanda EL, d'Elbée M, Kumwenda MK, Ringwald B, Maringwa G, et al. 'I  
493 will choose when to test, where I want to test': investigating young people's preferences  
494 for HIV self-testing in Malawi and Zimbabwe. *AIDS* 2017;31.
- 495 [45] Sam-Agudu NA, Folayan MO, Ezeanolue EE. Seeking wider access to HIV testing for  
496 adolescents in sub-Saharan Africa. *Pediatric Research* 2016;79:838–45.  
497 <https://doi.org/10.1038/pr.2016.28>.
- 498 [46] Knight R, Small W, Shoveller JA. HIV stigma and the experiences of young men with  
499 voluntary and routine HIV testing. *Sociology of Health & Illness* 2016;38:153–67.  
500 <https://doi.org/10.1111/1467-9566.12345>.
- 501 [47] Nall A, Chenneville T, Rodriguez LM, O'Brien JL. Factors Affecting HIV Testing among  
502 Youth in Kenya. *Int J Environ Res Public Health* 2019;16:1450.  
503 <https://doi.org/10.3390/ijerph16081450>.
- 504 [48] Hosek S, Pettifor A. HIV Prevention Interventions for Adolescents. *Curr HIV/AIDS Rep*  
505 2019;16:120–8. <https://doi.org/10.1007/s11904-019-00431-y>.
- 506 [49] Pettifor A, Stoner M, Pike C, Bekker L-G. Adolescent lives matter: preventing HIV in  
507 adolescents. *Curr Opin HIV AIDS* 2018;13:265–73.  
508 <https://doi.org/10.1097/COH.0000000000000453>.
- 509 [50] Sharma S, Malone S, Levy M, Reast J, Little K, Hasen N, et al. Understanding barriers to  
510 HIV testing and treatment: a study of young men and healthcare providers in KwaZulu-  
511 Natal and Mpumalanga. *South African Health Review* 2019;2019:125–32.
- 512 [51] Faust L, Yaya S. The effect of HIV educational interventions on HIV-related knowledge,  
513 condom use, and HIV incidence in sub-Saharan Africa: a systematic review and meta-  
514 analysis. *BMC Public Health* 2018;18:1254. <https://doi.org/10.1186/s12889-018-6178-y>.
- 515 [52] Ajide K, Balogun F. Knowledge of HIV and intention to engage in risky sexual behaviour  
516 and practices among senior school adolescents in Ibadan, Nigeria. *Archives of Basic and*  
517 *Applied Medicine* 2018;6:3.
- 518 [53] Tiwari R, Wang J, Han H, Kalu N, Sims LB, Katz DA, et al. Sexual behaviour change  
519 following HIV testing services: a systematic review and meta-analysis. *Journal of the*  
520 *International AIDS Society* 2020;23:e25635. <https://doi.org/10.1002/jia2.25635>.
- 521 [54] Sanga ES, Mukumbang FC, Mushi AK, Lerebo W, Zarowsky C. Understanding factors  
522 influencing linkage to HIV care in a rural setting, Mbeya, Tanzania: qualitative findings of  
523 a mixed methods study. *BMC Public Health* 2019;19:383.  
524 <https://doi.org/10.1186/s12889-019-6691-7>.
- 525 [55] Sande L, Maheswaran H, Mangenah C, Mwenge L, Indravudh P, Mkandawire P, et al.  
526 Costs of accessing HIV testing services among rural Malawi communities. *AIDS Care*  
527 2018;30:27–36. <https://doi.org/10.1080/09540121.2018.1479032>.

- 528 [56] World Health Organization. Guidelines on HIV self-testing and partner notification:  
529 supplement to consolidated guidelines on HIV testing services. Geneva, Switzerland:  
530 World Health Organization; 2016.
- 531 [57] Wilson KS, Mugo C, Katz DA, Manyeki V, Mungwala C, Otiso L, et al. High Acceptance  
532 and Completion of HIV Self-testing Among Diverse Populations of Young People in  
533 Kenya Using a Community-Based Distribution Strategy. *AIDS and Behavior*  
534 2022;26:964–74. <https://doi.org/10.1007/s10461-021-03451-1>.
- 535 [58] Feroz AS, Ali NA, Khoja A, Asad A, Saleem S. Using mobile phones to improve young  
536 people sexual and reproductive health in low and middle-income countries: a systematic  
537 review to identify barriers, facilitators, and range of mHealth solutions. *Reprod Health*  
538 2021;18:9–9. <https://doi.org/10.1186/s12978-020-01059-7>.
- 539 [59] Garg PR, Uppal L, Mehra S, Mehra D. Mobile Health App for Self-Learning on HIV  
540 Prevention Knowledge and Services Among a Young Indonesian Key Population: Cohort  
541 Study. *JMIR Mhealth Uhealth* 2020;8:e17646–e17646. <https://doi.org/10.2196/17646>.
- 542 [60] Jennings Mayo-Wilson L, Kang B-A, Mathai M, Mak'anyengo MO, Ssewamala FM.  
543 Mobile phone access, willingness, and usage for HIV-related services among young  
544 adults living in informal urban settlements in Kenya: A cross-sectional analysis.  
545 *International Journal of Medical Informatics* 2022;161:104728.  
546 <https://doi.org/10.1016/j.ijmedinf.2022.104728>.
- 547 [61] Ippoliti NB, L'Engle K. Meet us on the phone: mobile phone programs for adolescent  
548 sexual and reproductive health in low-to-middle income countries. *Reproductive Health*  
549 2017;14:11. <https://doi.org/10.1186/s12978-016-0276-z>.
- 550 [62] Visser M, Kotze M, van Rensburg MJ. An mHealth HIV prevention programme for youth:  
551 lessons learned from the iloveLife.mobi programme in South Africa. *AIDS Care*  
552 2020;32:148–54. <https://doi.org/10.1080/09540121.2020.1742866>.
- 553 [63] Dizechi S, Brody C, Tuot S, Chhea C, Saphonn V, Yung K, et al. Youth paying for sex:  
554 what are the associated factors? Findings from a cross-sectional study in Cambodia.  
555 *BMC Public Health* 2018;18:113. <https://doi.org/10.1186/s12889-017-4999-8>.
- 556 [64] Pantelic M, Casale M, Cluver L, Toska E, Moshabela M. Multiple forms of discrimination  
557 and internalized stigma compromise retention in HIV care among adolescents: findings  
558 from a South African cohort. *J Intern AIDS Soc* 2020;23.  
559 <https://doi.org/10.1002/jia2.25488>.
- 560 [65] Aventin Á, Gordon S, Laurenzi C, Rabie S, Tomlinson M, Lohan M, et al. Adolescent  
561 condom use in Southern Africa: narrative systematic review and conceptual model of  
562 multilevel barriers and facilitators. *BMC Public Health* 2021;21:1228.  
563 <https://doi.org/10.1186/s12889-021-11306-6>.
- 564 [66] Yosef T, Nigussie T. Behavioral Profiles and Attitude toward Condom Use among  
565 College Students in Southwest Ethiopia. *BioMed Research International* 2020;2020:1–6.  
566 <https://doi.org/10.1155/2020/9582139>.

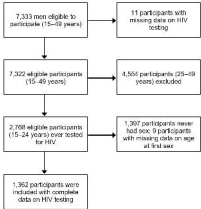

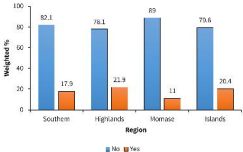

Source: https://medrxiv.org/content/medrxiv/early/2023/03/17/2023.03.17.23287339.full.pdf
